# Supplementary material for: Association between positive end-expiratory pressure ventilation and midazolam metabolism in patients in intensive care unit with and without COVID-19: A retrospective observational study
Source: Research Square preprint supplement (doi:10.21203/rs.3.rs-6804537/v1), 2025-06-10
Supplement: Supplementary file 1 [file d0781377e477c83e731da25a.docx]

## **Supplementary information**

**Article title:** Association between positive end-expiratory pressure ventilation and midazolam metabolism in patients in intensive care unit with and without COVID-19: A retrospective observational study

**Journal name:** European Journal of Clinical Pharmacology

Johanna Abma1,2,3*, Jos le Noble2,4, Johanna Driessen2,5, Kimberly Shudofsky1,2, Paddy Janssen1,2, Elisabeth Wammes-van der Heijden1

1Department of Clinical Pharmacy, VieCuri Medical Center, 5900 BX, Venlo, The Netherlands

2Department of Clinical Pharmacy and Toxicology, Maastricht University Medical Centre+ P.O. Box 616, 6200 MD, Maastricht, The Netherlands

3Clinical Pharmacy, Flevo Hospital, 1315 RA, Almere, The Netherlands

4Department of Intensive Care, VieCuri Medical Center, 5900 BX, Venlo, PO Box 1926, 5900 BX, The Netherlands

5Department of Clinical Pharmacy, CARIM, The Cardiovascular Research Institute Maastricht, Maastricht University, Maastricht, The Netherlands

***Corresponding author:** Johanna Abma, Email: jokramer@flevoziekenhuis.nl

**Supplementary Table S1** Cross-sectional characteristics of patients with and without COVID-19

|  | | With COVID-19  (n = 23) | Without COVID-19 (n = 27) | p-value |
| --- | --- | --- | --- | --- |
| Age (years) | | 61 (56–72) | 70 (59–75) | 0.231 |
| Female sex | | 6 (26.1) | 7 (25.9) | 1.000 |
| BMI (kg/m2) | | 29.3 (25.5–30.9) | 30.5 (25.2–31.8) | 0.521 |
| Prone position | | 9 (39.1) | 1 (3.7) | 0.003 |
| SOFA | | 7 (5–9) | 8 (3–10) | 0.891 |
| APACHE4 score | | 53 (45–65) | 84 (57–98) | 0.000 |
| Heart failure | | 1 (4.3) | 6 (22.2) | 0.107 |
| Diabetes mellitus | | 6 (26.1) | 5 (18.5 | 0.733 |
| ICU days | | 18 (12–24) | 16 (9–24) | 0.219 |
| Survived ICU | | 15 (65.2) | 16 (59.3) | 0.773 |
| IL-6 inhibitor use | | 4 (17.4) | 0 (0) | 0.038 |
| CRP (mg/L) | | 186 (74–309) | 174 (102–274) | 0.676 |
| CKD-EPI eGFR category: | |  |  | 0.210 |
| ≥90 mL/min | 11 (47.8) | 9 (33.3) |  |
| 60–89 mL/min | 8 (34.8) | 5 (18.5) |
| 30–59 mL/min | 2 (8.7) | 5 (18.5) |
| 15–29 mL/min | 1 (4.3) | 5 (18.5) |
| <15 mL/min | 0 (0) | 0 (0) |
| CVVH | 1 (4.3) | 3 (11.1) |
| PEEP score | | 10 (8–12) | 10 (8–11) | 0.586 |
| Strong CYP3A4 inhibitor use | | 8 (34.8) | 2 (7.4) | 0.030 |
| Strong CYP3A4 inducer use | | 0 (0) | 0 (0) | NA |
| Midazolam infusion rate (mg/h) | | 10 (8–15) | 8 (6–14) | 0.135 |
| Midazolam dose (mg/kg/h) | | 0.13 (0.10–0.16) | 0.11 (0.07–0.15) | 0.188 |
| Midazolam (mg/L) | | 0.85 (0.61–1.37) | 0.55 (0.37–1.01) | 0.054 |
| 1OH-midazolam (mg/L) | | 0.062 (0.037–0.088) | 0.038 (0.024–0.067) | 0.092 |

Data are presented as the median (interquartile range) or n (%). COVID-19, coronavirus disease 2019; BMI, body mass index; SOFA, Sequential Organ Failure Assessment; APACHE4, Acute Physiology and Chronic Health Evaluation IV; ICU, intensive care unit; IL-6, interleukin (IL)-6; CRP, C-reactive protein; CKD-EPI, Chronic Kidney Disease Epidemiology Collaboration estimated glomerular filtration rate; CVVH, continue veno-venous hemofiltration; PEEP, positive end-expiratory pressure; CYP3A4, cytochrome P450 (CYP)3A4.

**Supplementary Table S2** Multivariable generalized estimating equation analysis of the 1OH-midazolam/midazolam metabolic ratio stratified for the PEEP category

| Model variable | PEEP ≤ 10 cmH2O | | PEEP > 10 cmH2O | |
| --- | --- | --- | --- | --- |
| **Beta (95% CI)** | **p˗value** | **Beta (95% CI)** | **p˗value** |
| COVID˗19 | 0.23 (˗0.21 to 0.67) | 0.313 | 0.70 (0.20 to 1.19) | 0.006 |
| Time midazolam initiation (days) | 0.06 (0.02 to 0.11) | 0.005 | 0.07 (0.03 to 0.11) | 0.001 |
| CYP3A4 inhibitor use | ˗0.28 (˗0.57 to 0.02) | 0.066 | ˗0.17 (˗0.44 to 0.10) | 0.217 |
| Heart failure | 0.00 (˗0.61 to 0.61) | 0.992 | ˗0.02 (˗0.67 to 0.62) | 0.945 |
| CRP* | ˗0.02 (˗0.03 to ˗0.01) | 0.004 | ˗0.02 (˗0.03 to 0.00) | 0.008 |
| APACHE4 score* | 0.13 (0.04 to 0.21) | 0.005 | 0.19 (0.08 to 0.30) | 0.001 |
| Age (years) | ˗0.03 (˗0.05 to ˗0.02) | 0.000 | ˗0.01 (˗0.03 to 0.00) | 0.062 |
| BMI (kg/m2) | 0.02 (˗0.03 to 0.06) | 0.462 | 0.00 (˗0.05 to 0.04) | 0.905 |
| Renal clearance |  |  |  |  |
| 30–89 mL/min | 0.43 (˗0.14 to 1.00) | 0.136 | ˗0.58 (˗1.13 to ˗0.02) | 0.041 |
| 10–29 mL/min or CVVH | 0.28 (˗0.08 to 0.63) | 0.126 | ˗0.55 (˗0.92 to ˗0.17) | 0.005 |

The molecular weight-adjusted 1OH-midazolam/midazolam metabolic ratio was log transformed. A one-unit change in a model variable (∆X = 1) represents a (eβ - 1) × 100% change. *CRP and APACHE4 score are included as variables in the analysis per 10 units; therefore, ∆X = 10. COVID-19, CYP3A4 inhibitors, and heart failure were expressed as present and not present. Renal clearance was expressed relative to good clearance (>90 mL/min). PEEP, positive end-expiratory pressure; CI, confidence interval; COVID-19, coronavirus disease 2019; CYP3A4, cytochrome P450 (CYP)3A4; CRP, C-reactive protein; APACHE4, Acute Physiology and Chronic Health Evaluation IV; BMI, body mass index; CVVH, continuous veno-venous hemofiltration.

**Supplementary Table S3** Multivariable generalized estimating equation analysis of the 1OH-midazolam/midazolam metabolic ratio stratified for COVID-19

| Model variable | With COVID˗19 | | Without COVID˗19 | |
| --- | --- | --- | --- | --- |
| **Beta (95% CI)** | **p˗value** | **Beta (95% CI)** | **p˗value** |
| PEEP category | 0.21 (˗0.01 to 0.44) | 0.060 | ˗0.08 (˗0.41 to 0.25) | 0.639 |
| Time midazolam initiation (days) | 0.08 (0.05 to 0.11) | 0.000 | 0.04 (˗0.03 to 0.11) | 0.219 |
| CYP3A4 inhibitor use | ˗0.16 (˗0.36 to 0.04) | 0.118 | ˗0.59 (˗1.16 to ˗0.02) | 0.041 |
| Heart failure | ˗0.34 (˗1.37 to 0.68) | 0.512 | 0.04 (˗0.43 to 0.51) | 0.866 |
| CRP* | ˗0.02 (˗0.03 to ˗0.01) | 0.000 | ˗0.01 (˗0.03 to 0.00) | 0.172 |
| APACHE4 score* | 0.32 (0.19 to 0.45) | 0.000 | 0.10 (0.01 to 0.18) | 0.027 |
| Age (years) | ˗0.01 (˗0.03 to 0.00) | 0.065 | ˗0.03 (˗0.04 to ˗0.02) | 0.000 |
| BMI (kg/m2) | 0.03 (˗0.01 to 0.07) | 0.092 | 0.02 (˗0.03 to 0.07) | 0.388 |
| Renal clearance |  |  |  |  |
| 30–89 mL/min | ˗0.03 (˗0.50 to 0.44) | 0.893 | ˗0.07 (˗0.63 to 0.49) | 0.809 |
| 10–29 mL/min or CVVH | 0.10 (˗0.21 to 0.41) | 0.515 | ˗0.36 (˗0.77 to 0.06) | 0.096 |

The molecular weight-adjusted 1OH-midazolam/midazolam metabolic ratio was log transformed. A one-unit change in a model variable (∆X = 1) represents a (eβ - 1) × 100% change. *CRP and APACHE4 score are included as variables in the analysis per 10 units; therefore, ∆X = 10. The PEEP-category is represented as high PEEP (> 10 cmH2O) compared to low PEEP (≤ 10 cmH2O). COVID-19, CYP3A4 inhibitors, and heart failure were expressed as present compared to not present. Renal clearance was expressed relative to good clearance (>90 mL/min). PEEP, positive end-expiratory pressure; CI, confidence interval; COVID-19, coronavirus disease 2019; CYP3A4, cytochrome P450 (CYP)3A4; CRP, C-reactive protein; APACHE4, Acute Physiology and Chronic Health Evaluation IV; BMI, body mass index; CVVH, continuous veno-venous hemofiltration.
